# Supplementary material for: Neck circumference is a highly reliable anthropometric measure in older adults requiring long-term care
Source: PeerJ. 2024 Jan 31;12:e16816. doi: 10.7717/peerj.16816 (PMC10838066; doi:10.7717/peerj.16816)
Supplement: Supplemental Information 2 [file peerj-12-16816-s002.xlsx]

## Sheet: Sheet1
No	Sex(Male:1, Female:2)	Height	Weight	Age	BMI	Examiner A Neck circumference First	Examiner A Neck circumference Second	Examiner B Neck circumference First	Examiner B Neck circumference Second	Inter-rater measurement error	ECW/TBW	FAT	SMI	Cerebrovascular disease	Respiratory disease	Cardiovascular disease	Hypertension	Cancer	Diabetes mellitus	Orthopedic disease	Intractable neurological disease	Barthel index
1	1	167.2	62.8	71	22.5	38.5	38.5	38.3	38.5	0.2	0.387	9.3	8.40611	0	0	0	0	0	1	0	1	90
2	2	165.1	64.9	74	23.8	34.1	34.2	33.2	33.1	0.9	0.395	34.6	6.19634	1	0	0	1	0	1	0	0	95
3	2	150.4	42.7	82	18.9	32.5	32.4	31.7	31.7	0.8	0.398	21.2	5.26521	1	0	0	1	0	0	0	0	70
4	2	139.9	54	76	27.6	36.2	36.1	36	36.1	0.2	0.39	44.7	5.46699	1	0	0	1	0	1	0	0	100
5	1	162	50.4	75	19.2	33.9	33.9	33.7	33.7	0.2	0.393	21.2	5.64319	1	0	0	0	0	0	1	0	100
6	1	156.7	77.7	79	31.6	46.4	46.5	47	47	0.6	0.39	40.6	7.60745	1	0	1	1	0	0	0	0	35
7	1	167.2	53.3	89	19.1	36.7	36.8	36.9	36.5	0.2	0.408	25.2	5.88786	1	0	0	0	1	0	0	0	35
8	1	160.9	64.4	77	24.9	39.8	39.9	40	40	0.2	0.389	37.2	6.62448	1	0	0	1	0	0	0	0	75
9	1	166.2	57.3	79	20.7	35.6	35.7	35.5	35.6	0.1	0.39	16.7	6.80244	1	0	1	1	0	0	1	0	80
10	1	162	61.3	77	23.4	36.1	36.2	36.7	36.6	0.6	0.386	35.4	6.07758	1	0	0	0	0	0	0	0	100
11	2	149.4	57.7	75	25.9	32.9	33	32.4	32.5	0.5	0.402	38.1	5.9094	0	0	0	0	0	0	1	0	95
12	1	168.3	66.6	80	23.5	36.9	37	36.7	36.7	0.2	0.4	22.6	7.79173	1	1	0	1	0	0	1	0	95
13	1	170.4	63.2	80	21.8	39.7	39.7	38.5	38.5	1.2	0.41	20.8	7.32879	1	1	1	0	1	0	1	0	80
14	2	155.7	74.2	74	30.6	38.6	38.6	37.5	37.6	1.1	0.404	37.4	7.9076	1	0	0	0	0	1	0	0	100
15	1	170.4	75.4	72	26	39.8	39.9	39.3	39.3	0.5	0.401	35.6	7.66286	1	0	0	1	0	0	0	0	75
16	1	162	55.9	80	21.3	37.4	37.4	37	37	0.4	0.402	37.3	5.23929	1	1	0	1	0	1	0	0	65
17	1	157.8	53.2	94	21.4	37.2	37.2	37	37	0.2	0.406	18.6	6.807	1	0	0	0	0	0	0	0	100
18	2	146.2	43	85	20.1	32.6	32.6	32.5	32.5	0.1	0.397	37	4.1966	1	0	1	1	0	0	0	0	70
19	1	179.8	86.9	66	26.9	39.1	39.1	38.8	38.9	0.3	0.386	28.3	8.24671	1	0	0	0	0	0	0	0	90
20	1	154.6	42.3	81	17.7	33.4	33.3	34	33.9	0.6	0.405	20.1	4.75291	0	0	0	0	0	0	0	1	35
21	2	151.5	53.9	88	23.5	34	34	34.1	34.2	0.1	0.398	36.4	5.52451	0	0	1	1	0	0	1	0	95
22	1	172.5	79.8	68	26.8	40.3	40.2	40	40	0.3	0.383	36.1	7.35644	1	0	1	0	0	0	1	0	75
23	2	152.5	56	91	24.1	35.6	35.7	35.5	35.5	0.1	0.408	36.3	5.62429	1	0	1	1	0	1	1	0	85
24	2	152.5	67.7	68	29.1	37.6	37.8	36.9	37	0.7	0.394	38.8	7.37006	1	0	0	1	0	1	0	0	100
25	1	167.2	51.9	80	18.6	35	35.1	34.3	34.4	0.7	0.404	22	5.78055	0	0	1	0	0	1	1	0	85
26	1	167.2	80.1	80	28.6	41.4	41.4	41.2	41.3	0.2	0.4	41.6	7.2221	1	0	0	1	0	0	0	0	60
27	2	154.6	46.5	81	19.5	33.8	33.8	33.5	33.6	0.3	0.408	21.8	5.0918	1	0	0	0	0	0	0	0	70
28	1	160.9	55.1	76	21.3	38	37.9	38	37.9	0	0.396	38.5	5.09487	1	0	0	0	0	0	1	0	5
29	1	158.8	64	85	25.4	39.6	39.6	40.1	40	0.5	0.396	36.7	6.26947	1	0	0	0	0	0	1	0	95
30	2	154.6	47.9	76	20	34.5	34.4	34.1	34	0.4	0.409	30	4.69015	1	0	0	1	0	0	0	0	50
31	1	162	68.2	85	26	40.4	40.4	40.3	40.4	0.1	0.398	35.4	7.04542	0	0	0	1	0	0	1	0	100
32	1	169.3	58.4	74	20.4	35.9	35.9	36	36.1	0.1	0.394	24.1	6.37767	0	0	0	1	0	1	1	1	85
33	1	158.8	54.4	68	21.6	36.6	36.5	37	37	0.4	0.405	34.4	5.53585	1	0	0	0	0	1	1	0	90
34	1	175.6	75.4	80	24.5	40.1	40.1	40	40	0.1	0.392	24.7	7.85138	1	0	0	0	0	0	1	0	90
35	2	148.3	49.2	89	22.4	32.4	32.3	31.6	31.5	0.8	0.4	37	4.73789	1	0	0	1	0	0	0	0	60
36	1	169.3	71	75	24.8	36.9	37	37.3	37.3	0.4	0.407	42.2	5.5857	0	1	0	1	0	0	1	0	70
37	1	166.2	66.6	77	24.1	38	38	37.8	37.9	0.2	0.395	26.7	7.43236	1	0	0	0	0	0	0	0	100
38	1	169.3	62.4	91	21.8	39.5	39.4	39	39	0.5	0.404	23.4	7.03358	1	0	0	0	1	0	0	0	70
39	2	145.2	54.3	87	25.8	34.1	34.1	34.1	34.1	0	0.42	48.5	5.43091	0	0	1	0	0	1	1	0	75
40	2	148.3	46.8	77	21.3	33.7	33.6	33.1	33	0.6	0.412	28.8	5.15621	0	1	0	0	0	1	1	0	70
41	1	179.8	91	67	28.1	44.4	44.5	46	46	1.6	0.392	39.6	7.50432	1	0	0	0	1	0	0	0	45
42	1	164.1	61.6	65	22.9	36.9	36.8	36.5	36.6	0.4	0.386	25.5	6.73999	1	0	0	0	0	0	0	0	100
43	1	173.5	72.7	76	24.2	38.8	38.9	38.6	38.6	0.2	0.388	23.1	7.86984	1	0	0	1	0	0	0	0	95
44	1	173.5	47.5	95	15.8	32.9	33.1	33.4	33.4	0.5	0.403	5	6.88653	1	1	0	0	0	1	0	0	100
45	2	146.2	54.3	87	25.4	35.1	35.1	34.1	34.1	1	0.392	37.9	5.60483	0	0	1	0	0	0	1	0	75
46	1	165.1	59.9	82	22	36.5	36.4	36.4	36.3	0.1	0.405	18.9	7.75919	0	0	0	0	0	0	0	1	90
47	1	170.4	51.2	71	17.6	34.1	34	34.5	34.5	0.4	0.393	13.1	6.58145	0	0	0	0	1	0	1	0	100
48	2	147.3	42.9	87	19.8	34.2	34.1	34.1	34.1	0.1	0.397	21.4	5.81179	0	0	0	0	0	0	1	0	80
49	1	167.2	62.2	81	22.2	36.6	36.7	36.9	36.9	0.3	0.397	33.8	6.16687	0	0	0	1	1	0	1	1	100
50	2	163	46.6	79	17.5	31.5	31.5	32	32	0.5	0.397	10.7	5.86774	1	0	0	0	0	0	1	0	90
51	1	171.4	60.9	75	20.7	38	38.1	37.9	38	0.1	0.399	4	8.93187	1	0	0	0	1	0	1	1	50
52	1	169.3	60.7	86	21.2	38.4	38.4	38.3	38.3	0.1	0.392	18	7.01265	1	0	1	0	0	0	0	0	100
53	1	159.9	55.4	69	21.7	34.8	35.1	35.5	35.5	0.7	0.399	28.3	6.07009	1	0	1	1	0	1	1	0	95
54	2	150.4	46.3	93	20.5	36.8	36.8	36	36.1	0.8	0.409	25.9	5.53489	0	1	1	1	0	0	1	1	55
55	2	157.8	52.2	78	21	36.5	36.6	35	35	1.5	0.398	39.3	4.74281	0	0	0	1	0	1	1	1	80
56	1	166.2	47.2	89	17.1	33.7	33.6	33.4	33.4	0.3	0.409	9.3	6.36439	0	1	0	1	1	0	1	0	90
57	2	154.6	48.2	79	20.2	32.8	32.7	31.9	32	0.9	0.379	14.3	6.38881	1	0	0	0	1	0	1	1	100
58	1	165.1	77.8	77	28.5	41.2	41.3	41.2	41.2	0	0.391	29.5	8.45623	1	0	0	1	0	0	0	0	90
59	2	147.3	48.6	68	22.4	33.3	33.4	32.6	32.6	0.7	0.399	35.6	4.8301	1	0	1	0	0	1	1	0	100
60	2	147.3	80.7	82	37.2	41	40.9	40.5	40.5	0.5	0.403	48	8.34206	0	1	0	1	0	0	1	0	75
61	2	147.3	44.8	74	20.6	31.9	31.9	32.5	32.5	0.6	0.397	23.8	5.74726	0	0	1	1	0	0	0	1	100
62	1	159.9	64.6	81	25.3	40.4	40.5	40	40	0.4	0.389	28.7	7.37249	1	1	0	1	0	0	1	0	65
63	2	156.7	60.8	81	24.8	32.4	32.4	33.6	33.6	1.2	0.399	39.5	6.07211	0	0	0	1	0	0	0	0	85
64	1	155.7	64.1	81	26.4	39	39.2	39.5	39.5	0.5	0.398	34.2	6.71548	1	0	1	1	1	0	0	0	95
65	2	152.5	53.5	83	23	33.6	33.6	33.9	33.8	0.3	0.409	32	5.82209	0	0	0	1	0	0	1	0	90
66	1	163	63.7	84	24	36.9	36.8	36.5	36.5	0.4	0.395	34.2	6.24036	1	0	0	1	0	1	0	0	100
67	1	168.3	61.4	70	21.7	37.4	37.4	37.4	37.5	0	0.4	17.1	7.23745	1	0	1	0	0	0	1	0	95
68	2	151.5	69.6	76	30.3	35.9	36	35.4	35.3	0.5	0.397	45.6	6.21726	1	0	0	1	0	0	1	0	100
69	1	168.3	60.3	92	21.3	35.4	35.3	35	35	0.4	0.395	21.7	6.77143	1	0	1	0	0	0	1	0	100
70	2	147.3	55.9	85	25.8	34.6	34.7	34.3	34.3	0.3	0.389	30.3	7.13914	0	0	0	1	0	0	1	0	100
71	2	137.8	49.4	81	26	33.2	33.1	33.3	33.3	0.1	0.409	38.7	5.20306	0	0	1	0	0	1	0	0	90
72	2	154.6	49.8	78	20.8	33.4	33.4	32.5	32.5	0.9	0.397	34.5	5.10017	0	0	0	0	0	1	1	0	95
73	1	162	60.3	87	23	36.9	36.9	36.5	36.5	0.4	0.38	22.5	7.28547	0	0	0	0	1	0	0	1	100
74	1	160.9	55.4	74	21.4	37.4	37.5	37.6	37.7	0.2	0.394	31.2	5.83264	0	0	0	0	1	0	1	0	100
75	1	158.8	63.8	87	25.3	38.4	38.4	39.1	39	0.7	0.399	34.3	6.28137	1	1	0	1	1	0	0	0	85
76	1	165.1	60.6	75	22.2	38	38	37.2	37.3	0.8	0.395	13.1	7.73718	1	0	0	1	0	0	0	1	85
77	1	158.8	56	74	22.2	37.9	37.9	37.5	37.6	0.4	0.4	16.4	7.29257	1	0	0	1	0	1	0	0	70
78	1	158.8	71	79	28.2	40.7	40.7	41.2	41.2	0.5	0.399	34.5	7.47895	0	0	0	0	0	1	1	0	85
79	1	178.8	76.1	82	23.8	39.3	39.4	38.5	38.6	0.8	0.392	24.1	7.71674	1	0	0	0	0	0	0	0	100
80	2	151.5	61.5	75	26.8	35.6	35.6	34.5	34.6	1.1	0.392	38.2	6.54402	0	0	0	0	0	1	1	0	100
81	2	152.5	48.9	83	21	33.2	33.3	33.6	33.6	0.4	0.401	33	4.85891	1	0	1	0	0	0	1	0	75
82	1	162	59.9	78	22.8	39.8	39.7	38.6	38.7	1.2	0.401	22.7	6.91968	0	0	0	1	0	1	1	0	85
83	1	166.2	49.2	82	17.8	36.4	36.4	36.5	36.5	0.1	0.401	23.9	5.29642	1	0	1	0	0	0	0	0	85
84	2	148.3	51.9	89	23.6	32.4	32.3	31.5	31.4	0.9	0.398	35.9	5.21077	0	0	0	1	1	0	1	0	90
85	1	164.1	63.2	80	23.5	38.3	38.3	37.5	37.5	0.8	0.39	15.9	8.37393	0	0	1	0	0	0	1	0	85
86	2	153.6	64.4	79	27.3	34.9	34.8	35	35	0.1	0.396	43.5	5.70085	0	0	0	1	0	0	1	0	100
87	1	155.7	66.2	81	27.3	38.8	38.9	38.6	38.7	0.2	0.381	32.3	7.21461	0	0	0	1	0	0	1	1	95
88	2	165.1	70	71	25.7	37.6	37.5	37.5	37.5	0.1	0.391	24.7	7.81055	0	0	0	0	0	0	1	1	90
89	2	148.3	55.1	82	25.1	34.6	34.6	34.6	34.6	0	0.395	39	5.66092	0	0	0	0	0	0	1	0	95
90	2	149.4	57.5	76	25.8	36	35.9	35.6	35.6	0.4	0.386	42.8	5.5017	0	0	0	0	0	0	1	0	80
91	1	158.8	61.8	87	24.5	39	38.9	38.5	38.5	0.5	0.415	25.3	6.87223	1	0	0	1	1	0	1	0	100
92	1	158.8	59.3	82	23.5	38	38.1	38.5	38.6	0.5	0.388	20.7	7.50274	1	0	1	0	1	0	1	0	95
93	1	168.3	66.1	78	23.3	39	39.1	39.5	39.5	0.5	0.416	37.7	5.88881	1	1	1	0	0	0	1	0	60
94	1	163	60.1	85	22.6	38.9	38.9	38.7	38.8	0.2	0.392	16.3	7.55392	1	0	0	0	0	0	1	0	100
95	2	152.5	38.3	90	16.5	32.6	32.4	32.4	32.4	0.2	0.406	15.2	4.69981	0	1	1	0	0	0	1	0	90
96	1	159.9	48.4	89	18.9	33.6	33.7	34	34.2	0.4	0.397	18.5	6.11311	1	0	1	1	0	0	0	0	100
97	1	165.1	47	79	17.2	32	32.1	31.5	31.6	0.5	0.396	10.7	6.42013	0	1	0	0	0	0	0	0	100
98	1	176.7	82.2	76	26.3	40.7	40.7	41	41.1	0.3	0.385	26.5	8.25676	1	0	0	1	0	0	0	0	85
99	2	148.3	43.6	85	19.8	31.3	31.4	31.5	31.5	0.2	0.393	27.7	4.99252	0	0	0	0	0	0	1	0	100
100	2	147.3	49.7	78	22.9	33.7	33.8	33.8	33.7	0.1	0.395	36.5	4.66418	1	0	0	0	0	1	0	0	30
101	2	149.4	45.1	86	20.2	33.2	33.2	33.2	33.2	0	0.408	22.4	5.21945	1	0	0	1	0	0	0	0	95
102	1	160.9	71.8	75	27.7	41.6	41.5	41.2	41.2	0.4	0.396	34.4	7.50904	1	0	0	1	0	0	0	0	80
103	1	171.4	71.4	75	24.3	38.5	38.5	38.8	39	0.3	0.395	29.4	7.12439	1	0	1	0	1	0	1	0	90
104	2	160.9	61.3	87	23.7	36.4	36.3	36.5	36.5	0.1	0.4	42.7	5.33821	0	1	0	1	1	0	0	0	100
105	2	150.4	50.1	80	22.1	35.6	35.6	36	35.9	0.4	0.41	33.6	5.10606	1	0	1	1	0	0	0	0	90
106	1	163	55.7	82	21	36	36	36.4	36.4	0.4	0.393	17.7	6.81621	0	0	0	0	0	0	1	0	85
107	1	164.1	63.6	81	23.6	36.4	36.4	36.7	36.7	0.3	0.405	29.5	7.1819	0	1	0	0	1	0	0	0	95
108	1	166.2	51.1	81	18.5	34.4	34.4	34.7	34.7	0.3	0.406	19.2	5.98064	1	0	0	1	0	1	1	0	60
